# Supplementary material
Source: PubMed Central journal article supplement (PMC10209078)
Supplement: 41386_2022_1437_MOESM1_ESM.pdf [file 41386_2022_1437_MOESM1_ESM.pdf]

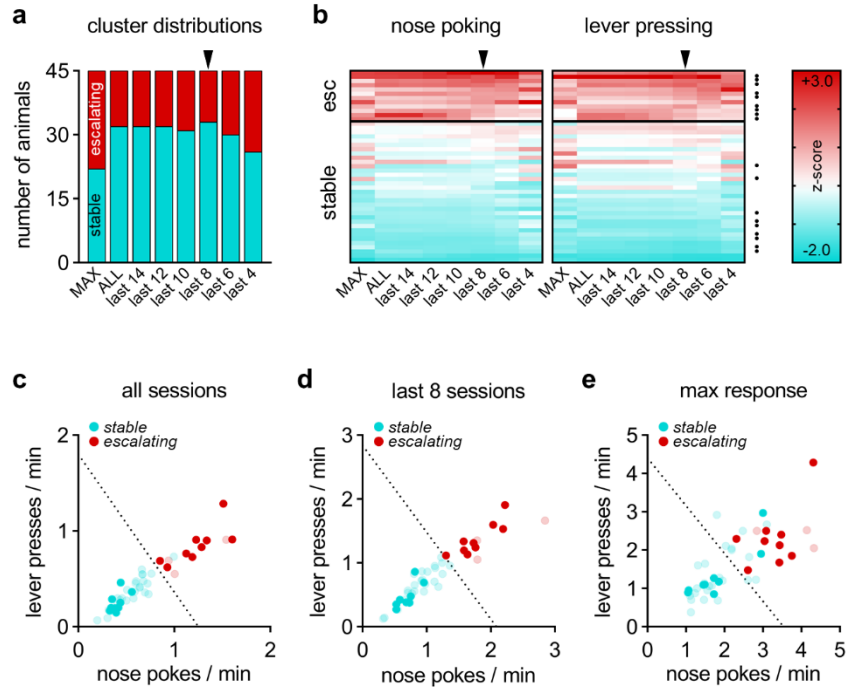

**Supplementary Figure 1. Unbiased clustering of cocaine self-administration behavior is stable across response parameters.** (a) Summary of  $k$ -means clustering distributions across response parameters. (b) Normalized response rates for individual nose-poking and lever-pressing responses across different clustering parameters. Animals clustered using last 8 sessions in main text (arrows). Animals included in follow-up experiments (dots; see Fig.1e-h, Fig.2). (c-e)  $k$ -means clustering results: average across all sessions (NP:  $F_{1,43}=97.2$ ,  $p<0.001$ ; LP:  $F_{1,43}=75.7$ ,  $p<0.001$ ), average across last 8 sessions (NP:  $F_{1,43}=87.4$ ,  $p<0.001$ ; LP:  $F_{1,43}=64.4$ ,  $p<0.001$ ), or maximum response session (NP:  $F_{1,43}=128$ ,  $p<0.001$ ; LP:  $F_{1,43}=88.3$ ,  $p<0.001$ ). Groups (stable vs. escalating) denote clustering results from main text (last 8). Animals included in follow-up experiments (solid points; see Fig.1e-h, Fig.2). Data presented as individual points.

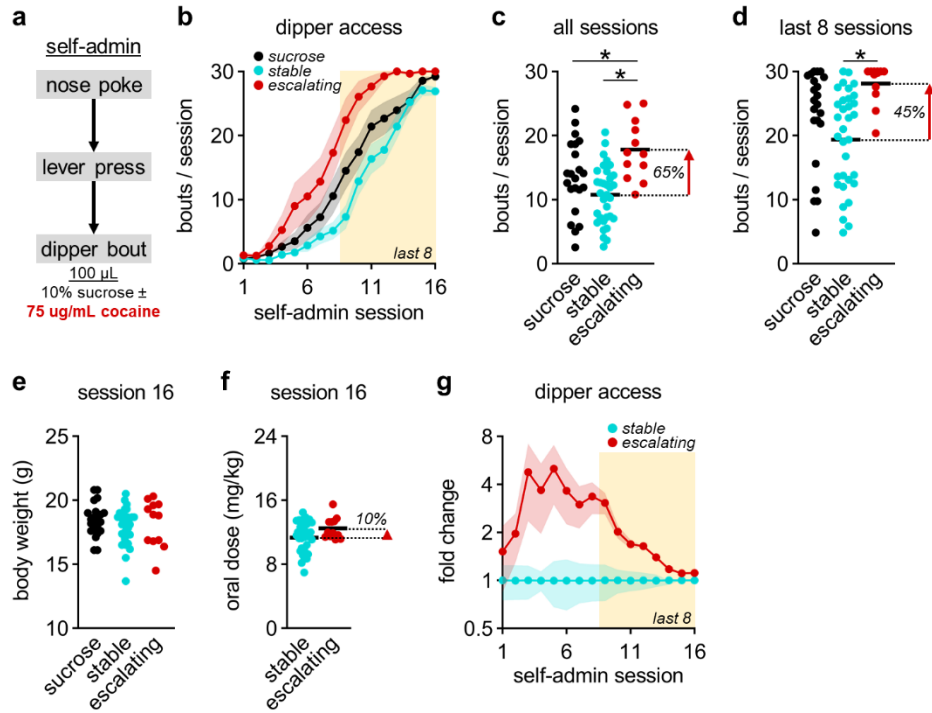

**Supplementary Figure 2. Estimates of oral cocaine doses earned per self-administration session.** (a) Response sequencing during self-administration sessions. (b) Number of dipper access bouts (10-second, 100  $\mu$ L) per session (session:  $F_{15,960}=134$ ,  $p<0.001$ ,  $\eta^2=0.67$ ; session  $\times$  group:  $F_{30,960}=2.25$ ,  $p<0.001$ ,  $\eta^2=0.07$ ). Sessions terminated following 30 access bouts were earned. (c-d) Dipper bouts earned per session across all ( $F_{2,64}=9.13$ ,  $p<0.001$ ,  $\eta^2=0.22$ ) or last 8 sessions ( $F_{2,64}=7.04$ ,  $p=0.002$ ,  $\eta^2=0.18$ ). Percent difference for escalating vs. stable responders noted. (e) Body weights during final self-administration session ( $F_{2,64}=1.00$ ,  $p=0.372$ ,  $\eta^2=0.03$ ). (f) Maximum oral cocaine dose achievable during final self-administration session ( $t_{43}=1.94$ ,  $p=0.059$ ,  $d=0.65$ ). Percent difference for escalating vs. stable responders noted. (g) Normalized dipper access bouts per session (session:  $F_{15,645}=4.31$ ,  $p<0.001$ ,  $\eta^2=0.09$ ; session  $\times$  group:  $F_{15,645}=4.31$ ,  $p<0.001$ ,  $\eta^2=0.09$ ). Data presented as individual points or mean  $\pm$  S.E.M. \* $p<0.05$  (post hoc).

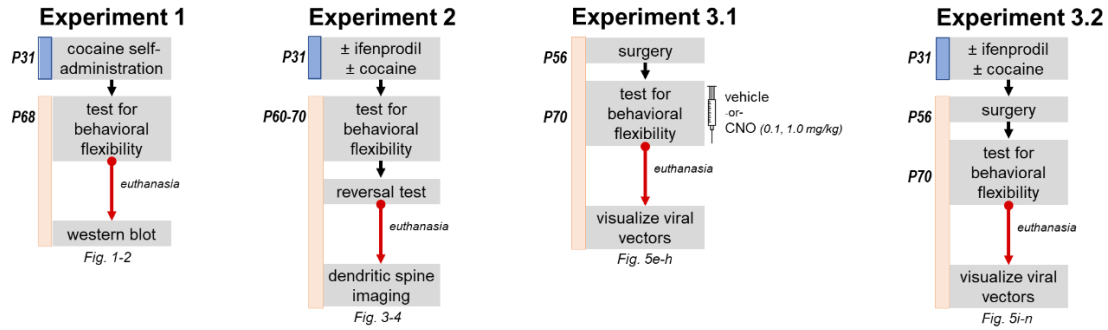

**Supplementary Figure 3. Schematic of experiments in this report.** Adolescent manipulations are indicated by blue tags, while the peach color indicates events occurring in adulthood. The age at the start of events is indicated at left. “P” refers to postnatal day. The corresponding figures in the main text are indicated at bottom. Experiment 1 utilized cocaine self-administration, while subsequent experiments utilized experimenter-administered cocaine. Experiment 3.1 established an appropriate dose of CNO for use in experiment 3.2.

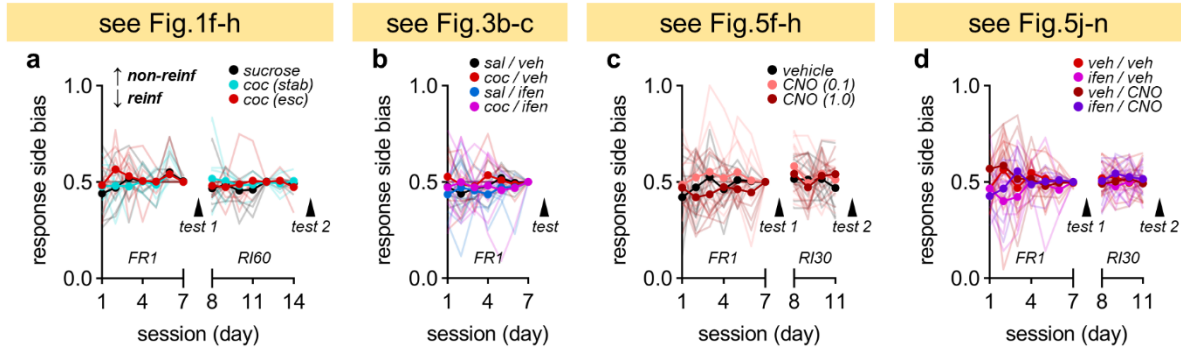

**Supplementary Figure 4. Mice do not display preference for one nose-poke aperture during training.** Response side bias (responses on aperture to be non-reinforced / total responses) during training sessions. **(a)** Following cocaine self-administration (session:  $F_{13,312}=1.71$ ,  $p=0.058$ ,  $\eta^2=0.07$ ; session  $\times$  group:  $F_{13,312}<1$ ). **(b)** Cocaine/ifenprodil co-administration (session:  $F_{6,198}<1$ ; session  $\times$  cocaine:  $F_{6,198}<1$ ; session  $\times$  ifenprodil:  $F_{6,198}=1.07$ ,  $p=0.384$ ,  $\eta^2=0.03$ ; session  $\times$  cocaine  $\times$  ifenprodil:  $F_{6,198}<1$ ). **(c)** BLA $\rightarrow$ OFC inactivation: CNO dose (session:  $F_{10,270}=1.48$ ,  $p=0.145$ ,  $\eta^2=0.05$ ; session  $\times$  CNO:  $F_{20,270}<1$ ), or **(d)** cocaine/ifenprodil co-administration (session:  $F_{10,290}<1$ ; session  $\times$  ifenprodil:  $F_{10,290}=1.57$ ,  $p=0.115$ ,  $\eta^2=0.05$ ; session  $\times$  CNO:  $F_{10,290}<1$ ; session  $\times$  ifenprodil  $\times$  CNO:  $F_{10,290}<1$ ). Data presented as individual points (semi-transparent) and group means (solid). Correspondence to main figures noted.

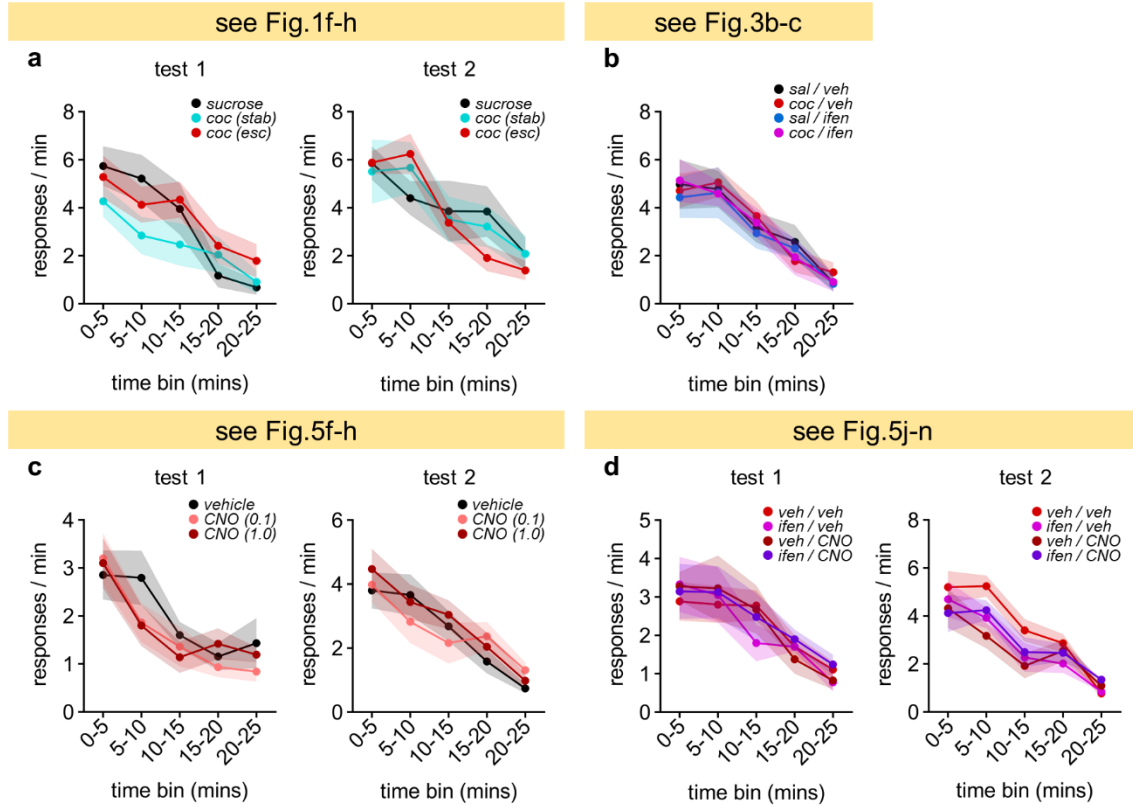

**Supplementary Figure 5. Responding during non-reinforced sessions did not differ between groups prior to choice tests.** All non-reinforced sessions were performed drug- and manipulation-free. **(a)** Cocaine self-administration: test 1 (time:  $F_{4,96}=21.8$ ,  $p<0.001$ ,  $\eta^2=0.48$ ; time  $\times$  group:  $F_{8,96}=1.44$ ,  $p=0.191$ ,  $\eta^2=0.11$ ) or test 2 (time:  $F_{4,96}=26.1$ ,  $p<0.001$ ,  $\eta^2=0.52$ ; time  $\times$  group:  $F_{8,96}=1.62$ ,  $p=0.128$ ,  $\eta^2=0.12$ ). **(b)** Cocaine/ifenprodil co-administration (time:  $F_{4,132}=43.3$ ,  $p<0.001$ ,  $\eta^2=0.57$ ; time  $\times$  cocaine:  $F_{4,132}<1$ ; time  $\times$  ifenprodil:  $F_{4,132}<1$ ; time  $\times$  cocaine  $\times$  ifenprodil:  $F_{4,132}<1$ ). **(c)** OFC $\rightarrow$ BLA inactivation (dose response): test 1 (time:  $F_{4,108}=16.5$ ,  $p<0.001$ ,  $\eta^2=0.38$ ; time  $\times$  group:  $F_{8,108}<1$ ) or test 2 (time:  $F_{4,108}=17.9$ ,  $p<0.001$ ,  $\eta^2=0.40$ ; time  $\times$  group:  $F_{8,108}<1$ ). **(d)** OFC $\rightarrow$ BLA inactivation (cocaine/ifenprodil co-administration): test 1 (time:  $F_{4,116}=13.2$ ,  $p<0.001$ ,  $\eta^2=0.31$ ; time  $\times$  ifenprodil:  $F_{4,108}<1$ ; time  $\times$  CNO:  $F_{4,108}<1$ ; time  $\times$  ifenprodil  $\times$  CNO:  $F_{4,108}<1$ ) or test 2 (time:  $F_{4,116}=31.2$ ,  $p<0.001$ ,  $\eta^2=0.52$ ; time  $\times$  ifenprodil:  $F_{4,108}<1$ ; time  $\times$  CNO:  $F_{4,116}=1.18$ ,  $p=0.326$ ,  $\eta^2=0.04$ ; time  $\times$  ifenprodil  $\times$  CNO:  $F_{4,108}<1$ ). Data presented as mean  $\pm$  S.E.M. Correspondence to main figures noted.

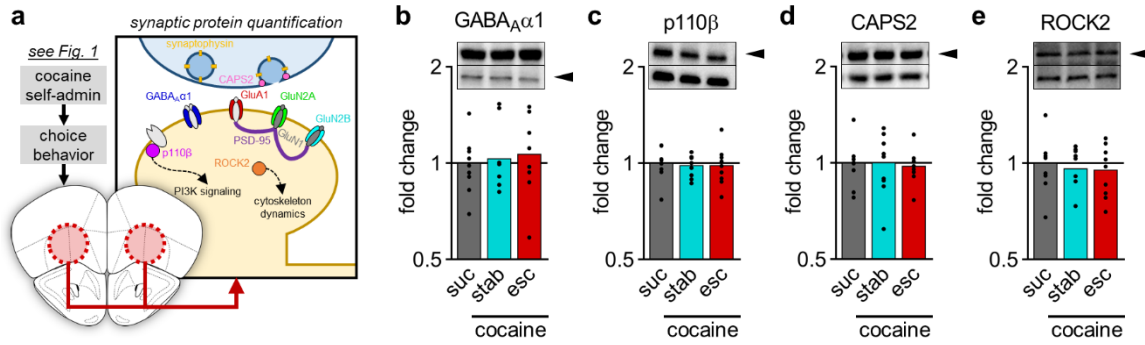

**Supplementary Figure 6. Quantification of additional synaptic and plasticity-related protein levels in the OFC following cocaine self-administration. (a)** Synaptic localization of additional quantified proteins in the OFC: **(b)** GABA<sub>A</sub>α1, **(c)** p110β, **(d)** CAPS2, and **(e)** ROCK2 (all  $F_{2,24} < 1$ ) Values normalized to loading controls (HSP-70) and expressed as fold change from sucrose controls. Representative blots show target protein (black arrow) and HSP-70 loading controls (no arrow). Data presented as individual points.

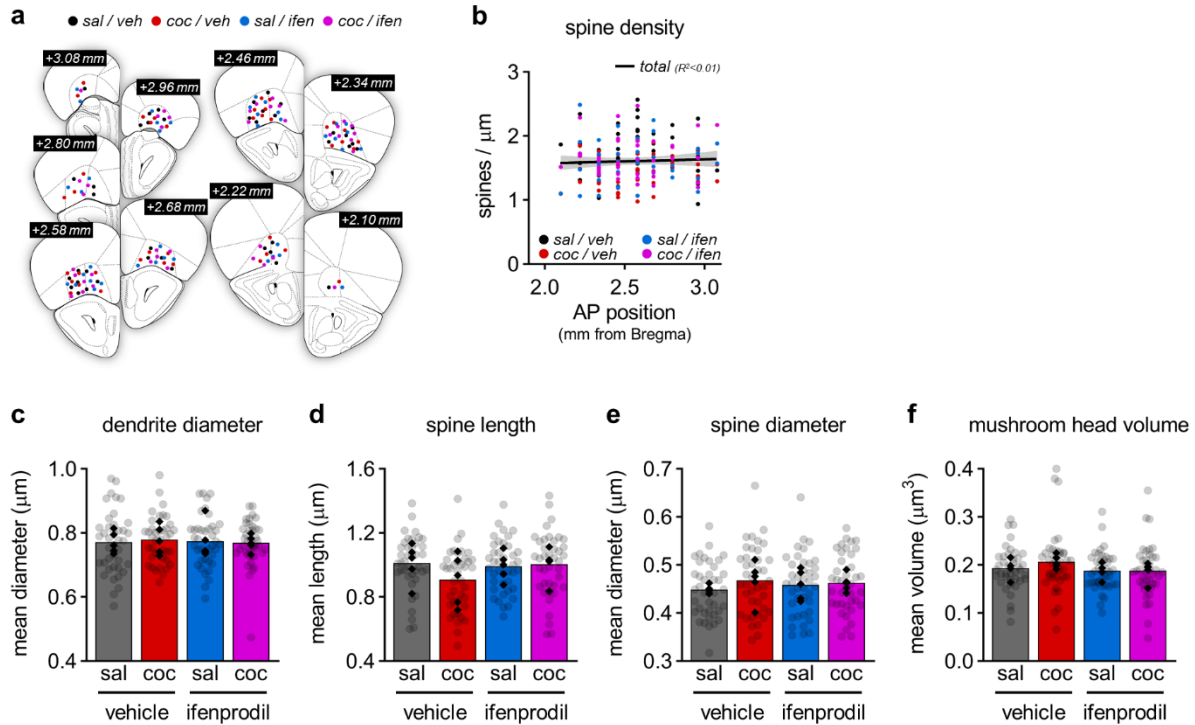

**Supplementary Figure 7. Additional OFC dendritic spine parameters.** (a) Location of sampled dendrites by anterior-posterior (AP) distance from bregma. (b) Dendritic spine density across A-P extent of the OFC ( $F_{1,158} < 1$ ). 95% confidence interval (shading). (c) Dendrite diameter (cocaine:  $F_{1,16} < 1$ ; ifenprodil:  $F_{1,16} < 1$ ; cocaine  $\times$  ifenprodil:  $F_{1,16} < 1$ ). (d) Dendritic spine length (cocaine:  $F_{1,16} < 1$ ; ifenprodil:  $F_{1,16} < 1$ ; cocaine  $\times$  ifenprodil:  $F_{1,16} = 1.17$ ,  $p = 0.30$ ). (e) Dendritic spine diameter (cocaine:  $F_{1,16} < 1$ ; ifenprodil:  $F_{1,16} < 1$ ; cocaine  $\times$  ifenprodil:  $F_{1,16} < 1$ ). (f) Head volume of mushroom-type spines (cocaine:  $F_{1,16} < 1$ ; ifenprodil:  $F_{1,16} < 1$ ; cocaine  $\times$  ifenprodil:  $F_{1,16} = 2.61$ ,  $p = 0.13$ ). Data presented as individual points (solid=per animal; transparent=per dendrite) or mean  $\pm$  S.E.M.

**Supplementary Table 1**

| <b>Antibody</b>                          | <b>Manufacturer</b>       | <b>Product</b> | <b>Dilution</b> | <b>Identifier</b> |
|------------------------------------------|---------------------------|----------------|-----------------|-------------------|
| Rabbit anti-PSD-95                       | Cell Signaling Technology | #3450          | 1:1000          | RRID AB 2292883   |
| Rabbit anti-Synaptophysin                | Abcam                     | #ab32127       | 1:10000         | RRID AB 2286949   |
| Mouse anti-GluN1                         | Millipore                 | #05-432        | 1:500           | RRID AB 390129    |
| Rabbit anti-GluN2A                       | Invitrogen                | #PA5-35377     | 1:500           | RRID AB 2552687   |
| Mouse anti-GluN2B                        | Novus                     | #NB100-74475   | 1:500           | RRID AB 1049238   |
| Rabbit anti-GluA1                        | Abcam                     | #ab31232       | 1:1000          | RRID AB 2113447   |
| Rabbit anti-GABA <sub>A</sub> $\alpha$ 1 | Millipore                 | #06-868        | 1:1000          | RRID AB 310272    |
| Rabbit anti-p110 $\beta$                 | Millipore                 | #09-482        | 1:500           | RRID AB 1977425   |
| Rabbit anti-CAPS2                        | Abcam                     | #ab69894       | 1:1000          | RRID AB 2068181   |
| Rabbit anti-ROCK2                        | Abcam                     | #ab71598       | 1:500           | RRID AB 1566688   |
| Mouse anti-HSP-70                        | Santa Cruz Biotechnology  | #sc-7298       | 1:1000          | RRID AB 627761    |
| Rabbit anti-HSP-70                       | Cell Signaling Technology | #4872          | 1:1000          | RRID AB 2279841   |
| Goat anti-mouse, peroxidase-conjugated   | Jackson ImmunoResearch    | #115-035-003   | 1:1000          | RRID AB 10015289  |
| Goat anti-rabbit, peroxidase conjugated  | Vector Laboratories       | #PI-1000       | 1:10000         | RRID AB 2336198   |



**Supplementary Table 2**

| Figure   | Measure                            | Groups                                                                                     | Analysis                      | Comparison            | Statistic          | p-value              | Effect size   |
|----------|------------------------------------|--------------------------------------------------------------------------------------------|-------------------------------|-----------------------|--------------------|----------------------|---------------|
| 1b       | response rate<br>(NP vs. LP)       | sucrose ( <i>n</i> =22)<br>cocaine (stab) ( <i>n</i> =33)<br>cocaine (esc) ( <i>n</i> =12) | <i>k</i> -means<br>clustering | nose poke             | $F_{1,43}=97.2$    | $p<0.001$            | n/a           |
|          |                                    |                                                                                            |                               | lever press           | $F_{1,43}=75.7$    | $p<0.001$            |               |
| 1b inset | seek:take                          |                                                                                            | ANOVA                         | group                 | $F_{2,64}=1.63$    | $p=0.204$            | $\eta^2=0.05$ |
| 1c left  | response rate                      |                                                                                            | RM ANOVA                      | session               | $F_{15,960}=50.2$  | $p<0.001$            | $\eta^2=0.44$ |
|          |                                    |                                                                                            |                               | session × group       | $F_{30,960}=3.63$  | $p<0.001$            | $\eta^2=0.10$ |
| 1c right |                                    |                                                                                            | ANOVA                         | group                 | $F_{2,64}=51.4$    | $p<0.001$            | $\eta^2=0.62$ |
|          |                                    |                                                                                            |                               | post-hoc:<br>Dunnnett | sucrose vs. stable | $\Delta=0.09\pm0.08$ | $p=0.492$     |
|          |                                    |                                                                                            | sucrose vs. escalating        | $\Delta=0.94\pm0.11$  | $p<0.001$          |                      |               |
| 1d left  |                                    |                                                                                            | RM ANOVA                      | session               | $F_{15,960}=68.1$  | $p<0.001$            | $\eta^2=0.52$ |
|          |                                    |                                                                                            |                               | session × group       | $F_{30,960}=3.64$  | $p<0.001$            | $\eta^2=0.10$ |
| 1d right |                                    |                                                                                            | ANOVA                         | group                 | $F_{2,64}=32.4$    | $p<0.01$             | $\eta^2=0.50$ |
|          |                                    |                                                                                            |                               | post-hoc:<br>Dunnnett | sucrose vs. stable | $\Delta=0.16\pm0.08$ | $p=0.072$     |
|          |                                    |                                                                                            | sucrose vs. escalating        | $\Delta=0.60\pm0.10$  | $p<0.001$          |                      |               |
| 1f       |                                    |                                                                                            | response rate                 | RM ANOVA              | session            | $F_{13,312}=7.39$    | $p<0.001$     |
|          |                                    | session × group                                                                            |                               |                       | $F_{26,312}=1.10$  | $p=0.338$            | $\eta^2=0.08$ |
| 1g       |                                    | RM ANOVA                                                                                   |                               | reinforcement         | $F_{1,24}=18.54$   | $p<0.001$            | $\eta^2=0.44$ |
|          |                                    |                                                                                            |                               | reinforcement × group | $F_{1,24}=3.47$    | $p=0.048$            | $\eta^2=0.22$ |
| 1g       | post-hoc:<br>paired <i>t</i> -test | reinf vs. non-reinf (suc)                                                                  |                               | $t_8=3.11$            | $p=0.015$          | $d=1.04$             |               |
|          |                                    | reinf vs. non-reinf (stab)                                                                 |                               | $t_8=5.83$            | $p<0.001$          | $d=1.94$             |               |
|          |                                    | reinf vs. non-reinf (esc)                                                                  |                               | $t_8=0.29$            | $p=0.777$          | $d=0.10$             |               |
| 1h       | RM ANOVA                           | reinforcement                                                                              |                               | $F_{1,24}=3.56$       | $p=0.078$          | $\eta^2=0.13$        |               |
|          |                                    | reinforcement × group                                                                      |                               | $F_{1,24}=0.09$       | $p=0.913$          | $\eta^2<0.01$        |               |

**Supplementary Table 3**

| Figure | Measure                     | Groups                                                                                  | Analysis                    | Comparison            | Statistic             | p-value   | Effect size   |
|--------|-----------------------------|-----------------------------------------------------------------------------------------|-----------------------------|-----------------------|-----------------------|-----------|---------------|
| 2b     | fold change                 | sucrose ( <i>n</i> =9)<br>cocaine (stab) ( <i>n</i> =9)<br>cocaine (esc) ( <i>n</i> =9) | ANOVA                       | group                 | $F_{2,24}=8.31$       | $p=0.002$ | $\eta^2=0.41$ |
|        |                             |                                                                                         | post-hoc:<br>Tukey HSD      | sucrose vs. stable    | $\Delta=0.01\pm 0.04$ | $p=0.969$ | n/a           |
|        |                             |                                                                                         |                             | stable vs. escalating | $\Delta=0.13\pm 0.04$ | $p=0.004$ |               |
| 2c     |                             |                                                                                         | ANOVA                       | group                 | $F_{2,24}=2.32$       | $p=0.120$ | $\eta^2=0.16$ |
| 2d     |                             |                                                                                         | ANOVA                       | group                 | $F_{2,24}=0.13$       | $p=0.876$ | $\eta^2=0.01$ |
| 2e     |                             |                                                                                         | ANOVA                       | group                 | $F_{2,24}=0.59$       | $p=0.564$ | $\eta^2=0.05$ |
| 2f     |                             |                                                                                         | ANOVA                       | group                 | $F_{2,24}=4.81$       | $p=0.017$ | $\eta^2=0.29$ |
|        |                             |                                                                                         | post-hoc:<br>Tukey HSD      | sucrose vs. stable    | $\Delta=0.14\pm 0.06$ | $p=0.045$ | n/a           |
|        |                             |                                                                                         |                             | stable vs. escalating | $\Delta=0.16\pm 0.06$ | $p=0.025$ |               |
| 2g     | ANOVA                       | group                                                                                   | $F_{2,24}=0.52$             | $p=0.603$             | $\eta^2=0.04$         |           |               |
| 2h     | choice vs.<br>protein level | cocaine (stab) ( <i>n</i> =9)<br>cocaine (esc) ( <i>n</i> =9)                           | simple linear<br>regression | cocaine (total)       | $F_{1,16}=11.7$       | $p=0.004$ | $R^2=0.42$    |
|        |                             |                                                                                         |                             | cocaine (stable)      | $F_{1,7}=6.76$        | $p=0.035$ | $R^2=0.49$    |
|        |                             |                                                                                         |                             | cocaine (escalating)  | $F_{1,7}=0.83$        | $p=0.392$ | $R^2=0.11$    |
| 2i     |                             |                                                                                         | simple linear<br>regression | cocaine (total)       | $F_{1,16}=12.0$       | $p=0.003$ | $R^2=0.43$    |
|        |                             |                                                                                         |                             | cocaine (stable)      | $F_{1,7}=4.42$        | $p=0.074$ | $R^2=0.39$    |
|        |                             |                                                                                         |                             | cocaine (escalating)  | $F_{1,7}=2.01$        | $p=0.199$ | $R^2=0.22$    |

**Supplementary Table 4**

| Figure | Measure            | Groups                                                                                                                                    | Analysis               | Comparison                         | Statistic                      | p-value       | Effect size   |          |
|--------|--------------------|-------------------------------------------------------------------------------------------------------------------------------------------|------------------------|------------------------------------|--------------------------------|---------------|---------------|----------|
| 3b     | response rate      | saline/vehicle ( <i>n</i> =9)<br>cocaine/vehicle ( <i>n</i> =9)<br>saline/ifenprodil ( <i>n</i> =10)<br>cocaine/ifenprodil ( <i>n</i> =9) | RM ANOVA               | session                            | $F_{6,198}=74.1$               | $p<0.001$     | $\eta^2=0.69$ |          |
|        |                    |                                                                                                                                           |                        | session × cocaine                  | $F_{6,198}=0.73$               | $p=0.626$     | $\eta^2=0.02$ |          |
|        |                    |                                                                                                                                           |                        | session × ifenprodil               | $F_{6,198}=1.69$               | $p=0.124$     | $\eta^2=0.05$ |          |
|        |                    |                                                                                                                                           |                        | session × coc × ifen               | $F_{6,198}=1.68$               | $p=0.127$     | $\eta^2=0.05$ |          |
| 3c     |                    |                                                                                                                                           | RM ANOVA               | reinforcement                      | $F_{1,33}=44.7$                | $p<0.001$     | $\eta^2=0.58$ |          |
|        |                    |                                                                                                                                           |                        | reinforcement × cocaine            | $F_{1,33}=11.7$                | $p=0.002$     | $\eta^2=0.26$ |          |
|        |                    |                                                                                                                                           |                        | reinforcement × ifenprodil         | $F_{1,33}=3.56$                | $p=0.068$     | $\eta^2=0.10$ |          |
|        |                    |                                                                                                                                           |                        | reinforcement × coc × ifen         | $F_{1,33}=5.85$                | $p=0.021$     | $\eta^2=0.15$ |          |
| 3d     |                    |                                                                                                                                           | reversal rate          | post-hoc:<br>paired <i>t</i> -test | reinf vs. non-reinf (sal/veh)  | $t_8=4.68$    | $p=0.002$     | $d=1.56$ |
|        |                    |                                                                                                                                           |                        |                                    | reinf vs. non-reinf (coc/veh)  | $t_8=1.33$    | $p=0.219$     | $d=0.44$ |
|        |                    |                                                                                                                                           |                        |                                    | reinf vs. non-reinf (sal/ifen) | $t_9=4.16$    | $p=0.002$     | $d=1.32$ |
|        |                    |                                                                                                                                           |                        |                                    | reinf vs. non-reinf (coc/ifen) | $t_8=4.56$    | $p=0.007$     | $d=1.19$ |
| 3e     | response rate      | RM ANOVA                                                                                                                                  | session                | $F_{3,99}=76.4$                    | $p<0.001$                      | $\eta^2=0.70$ |               |          |
|        |                    |                                                                                                                                           | session × cocaine      | $F_{3,99}=2.55$                    | $p=0.060$                      | $\eta^2=0.07$ |               |          |
|        |                    |                                                                                                                                           | session × ifenprodil   | $F_{3,99}=1.52$                    | $p=0.214$                      | $\eta^2=0.04$ |               |          |
|        |                    |                                                                                                                                           | session × coc × ifen   | $F_{3,99}=3.71$                    | $p=0.014$                      | $\eta^2=0.10$ |               |          |
| 3f     |                    | post-hoc:<br>ANOVA                                                                                                                        | coc × ifen (session 1) | $F_{1,33}=6.14$                    | $p=0.019$                      | $\eta^2=0.16$ |               |          |
|        |                    |                                                                                                                                           | coc × ifen (session 2) | $F_{1,33}=15.1$                    | $p<0.001$                      | $\eta^2=0.31$ |               |          |
|        |                    |                                                                                                                                           | coc × ifen (session 3) | $F_{1,33}=2.76$                    | $p=0.106$                      | $\eta^2=0.08$ |               |          |
|        |                    |                                                                                                                                           | coc × ifen (session 4) | $F_{1,33}=1.13$                    | $p=0.295$                      | $\eta^2=0.03$ |               |          |
| 3e     | RM ANOVA           | session                                                                                                                                   | $F_{3,99}=10.3$        | $p<0.001$                          | $\eta^2=0.24$                  |               |               |          |
|        |                    | session × cocaine                                                                                                                         | $F_{3,99}=1.03$        | $p=0.381$                          | $\eta^2=0.03$                  |               |               |          |
|        |                    | session × ifenprodil                                                                                                                      | $F_{3,99}=0.55$        | $p=0.651$                          | $\eta^2=0.02$                  |               |               |          |
|        |                    | session × coc × ifen                                                                                                                      | $F_{3,99}=0.06$        | $p=0.983$                          | $\eta^2<0.01$                  |               |               |          |
| 3f     | RM ANOVA           | session                                                                                                                                   | $F_{3,99}=40.1$        | $p<0.001$                          | $\eta^2=0.55$                  |               |               |          |
|        |                    | session × cocaine                                                                                                                         | $F_{3,99}=1.39$        | $p=0.251$                          | $\eta^2=0.04$                  |               |               |          |
|        |                    | session × ifenprodil                                                                                                                      | $F_{3,99}=0.69$        | $p=0.560$                          | $\eta^2=0.02$                  |               |               |          |
|        |                    | session × coc × ifen                                                                                                                      | $F_{3,99}=2.78$        | $p=0.045$                          | $\eta^2=0.08$                  |               |               |          |
| 3f     | post-hoc:<br>ANOVA | coc × ifen (session 1)                                                                                                                    | $F_{1,33}=6.14$        | $p=0.019$                          | $\eta^2=0.16$                  |               |               |          |
|        |                    | coc × ifen (session 2)                                                                                                                    | $F_{1,33}=15.1$        | $p<0.001$                          | $\eta^2=0.31$                  |               |               |          |
|        |                    | coc × ifen (session 3)                                                                                                                    | $F_{1,33}=2.76$        | $p=0.106$                          | $\eta^2=0.08$                  |               |               |          |
|        |                    | coc × ifen (session 4)                                                                                                                    | $F_{1,33}=1.13$        | $p=0.295$                          | $\eta^2=0.03$                  |               |               |          |

**Supplementary Table 5**

| Figure                    | Measure                  | Groups                                                                                                                                                                                                                           | Analysis                  | Comparison                | Statistic                 | p-value              | Effect size               |                      |              |                      |                 |           |
|---------------------------|--------------------------|----------------------------------------------------------------------------------------------------------------------------------------------------------------------------------------------------------------------------------|---------------------------|---------------------------|---------------------------|----------------------|---------------------------|----------------------|--------------|----------------------|-----------------|-----------|
| 4c                        | spine density            | saline/vehicle<br>( <i>n</i> =40 dendrites, 5 mice)<br>cocaine/vehicle<br>( <i>n</i> =40 dendrites, 5 mice)<br>saline/ifenprodil<br>( <i>n</i> =40 dendrites, 5 mice)<br>cocaine/ifenprodil<br>( <i>n</i> =40 dendrites, 5 mice) | 2-factor LMM              | cocaine                   | $F_{1,16}=2.80$           | $p=0.114$            | n/a                       |                      |              |                      |                 |           |
|                           |                          |                                                                                                                                                                                                                                  |                           | ifenprodil                | $F_{1,16}=0.35$           | $p=0.560$            |                           |                      |              |                      |                 |           |
|                           |                          |                                                                                                                                                                                                                                  |                           | cocaine × ifenprodil      | $F_{1,16}=7.35$           | $p=0.015$            |                           |                      |              |                      |                 |           |
|                           |                          |                                                                                                                                                                                                                                  | post-hoc:<br>1-factor LMM | sal/veh vs. coc/veh       | $F_{1,8}=9.86$            | $p=0.014$            |                           |                      |              |                      |                 |           |
|                           |                          |                                                                                                                                                                                                                                  |                           | sal/veh vs. sal/ifen      | $F_{1,8}=2.22$            | $p=0.175$            |                           |                      |              |                      |                 |           |
|                           |                          |                                                                                                                                                                                                                                  |                           | sal/ifen vs. coc/ifen     | $F_{1,8}=0.53$            | $p=0.489$            |                           |                      |              |                      |                 |           |
| 4d                        | choice vs. spine density |                                                                                                                                                                                                                                  |                           | simple linear regression  | all groups                | $F_{1,18}=4.68$      | $p=0.044$                 | $R^2=0.21$           |              |                      |                 |           |
|                           |                          |                                                                                                                                                                                                                                  |                           |                           | 2-factor LMM              | cocaine              | $F_{1,16}=5.10$           | $p=0.038$            | n/a          |                      |                 |           |
|                           |                          |                                                                                                                                                                                                                                  |                           |                           |                           | ifenprodil           | $F_{1,16}=0.42$           | $p=0.527$            |              |                      |                 |           |
|                           |                          |                                                                                                                                                                                                                                  |                           |                           |                           | cocaine × ifenprodil | $F_{1,16}=6.96$           | $p=0.009$            |              |                      |                 |           |
|                           |                          |                                                                                                                                                                                                                                  |                           |                           | post-hoc:<br>1-factor LMM | sal/veh vs. coc/veh  | $F_{1,8}=18.0$            | $p=0.003$            |              |                      |                 |           |
|                           |                          |                                                                                                                                                                                                                                  |                           |                           |                           | sal/veh vs. sal/ifen | $F_{1,8}=3.92$            | $p=0.083$            |              |                      |                 |           |
|                           |                          | sal/ifen vs. coc/ifen                                                                                                                                                                                                            |                           |                           |                           | $F_{1,8}=0.22$       | $p=0.653$                 |                      |              |                      |                 |           |
|                           |                          | 4e                                                                                                                                                                                                                               |                           |                           | spine density             |                      | 2-factor LMM              | cocaine              |              | $F_{1,16}=0.13$      | $p=0.721$       |           |
|                           |                          |                                                                                                                                                                                                                                  |                           |                           |                           |                      |                           | ifenprodil           |              | $F_{1,16}=0.03$      | $p=0.873$       |           |
|                           |                          |                                                                                                                                                                                                                                  |                           |                           |                           |                      |                           | cocaine × ifenprodil |              | $F_{1,16}=1.12$      | $p=0.306$       |           |
|                           |                          |                                                                                                                                                                                                                                  |                           |                           |                           |                      | post-hoc:<br>1-factor LMM | cocaine              |              | $F_{1,8}=5.11$       | $p=0.045$       |           |
|                           |                          |                                                                                                                                                                                                                                  |                           |                           |                           |                      |                           | ifenprodil           |              | $F_{1,8}=0.01$       | $p=0.949$       |           |
| cocaine × ifenprodil      | $F_{1,8}=0.83$           |                                                                                                                                                                                                                                  | $p=0.376$                 |                           |                           |                      |                           |                      |              |                      |                 |           |
| 4f                        | spine density            |                                                                                                                                                                                                                                  |                           | 2-factor LMM              |                           |                      | cocaine                   | $F_{1,16}=1.25$      | $p=0.280$    |                      |                 |           |
|                           |                          |                                                                                                                                                                                                                                  |                           |                           |                           |                      | ifenprodil                | $F_{1,16}=1.08$      | $p=0.315$    |                      |                 |           |
|                           |                          |                                                                                                                                                                                                                                  |                           |                           |                           |                      | cocaine × ifenprodil      | $F_{1,16}=5.20$      | $p=0.033$    |                      |                 |           |
|                           |                          |                                                                                                                                                                                                                                  |                           | post-hoc:<br>1-factor LMM |                           |                      | sal/veh vs. coc/veh       | $F_{1,8}=5.10$       | $p=0.037$    |                      |                 |           |
|                           |                          |                                                                                                                                                                                                                                  |                           |                           |                           |                      | sal/veh vs. sal/ifen      | $F_{1,8}=0.13$       | $p=0.727$    |                      |                 |           |
|                           |                          |                                                                                                                                                                                                                                  |                           |                           |                           |                      | sal/ifen vs. coc/ifen     | $F_{1,8}=0.10$       | $p=0.764$    |                      |                 |           |
|                           |                          | 4g                                                                                                                                                                                                                               |                           | spine density             |                           | 2-factor LMM         | sal/veh vs. coc/ifen      | $F_{1,8}=4.94$       | $p=0.042$    |                      |                 |           |
|                           |                          |                                                                                                                                                                                                                                  |                           |                           |                           |                      | coc/veh vs. coc/ifen      | $F_{1,8}=5.52$       | $p=0.047$    |                      |                 |           |
|                           |                          |                                                                                                                                                                                                                                  |                           |                           |                           |                      |                           |                      |              |                      |                 |           |
|                           |                          |                                                                                                                                                                                                                                  |                           |                           |                           | 4h                   | spine-type ratio          |                      | 2-factor LMM | cocaine              | $F_{1,16}=0.03$ | $p=0.864$ |
|                           |                          |                                                                                                                                                                                                                                  |                           |                           |                           |                      |                           |                      |              | ifenprodil           | $F_{1,16}=0.83$ | $p=0.376$ |
|                           |                          |                                                                                                                                                                                                                                  |                           |                           |                           |                      |                           |                      |              | cocaine × ifenprodil | $F_{1,16}=0.01$ | $p=0.949$ |
| post-hoc:<br>1-factor LMM | cocaine                  |                                                                                                                                                                                                                                  | $F_{1,8}=1.25$            |                           |                           |                      |                           |                      | $p=0.280$    |                      |                 |           |
|                           | ifenprodil               |                                                                                                                                                                                                                                  | $F_{1,8}=1.08$            |                           |                           |                      |                           |                      | $p=0.315$    |                      |                 |           |
|                           | cocaine × ifenprodil     |                                                                                                                                                                                                                                  | $F_{1,8}=5.20$            |                           |                           |                      |                           |                      | $p=0.033$    |                      |                 |           |

Supplementary Table 6

| Figure | Measure                         | Groups                                                                                    | Analysis                                                                                                                                        | Comparison                    | Statistic            | p-value           | Effect size   |               |
|--------|---------------------------------|-------------------------------------------------------------------------------------------|-------------------------------------------------------------------------------------------------------------------------------------------------|-------------------------------|----------------------|-------------------|---------------|---------------|
| 5f     | response rate                   | vehicle ( <i>n</i> =10)<br>CNO 0.1 mg/kg ( <i>n</i> =10)<br>CNO 1.0 mg/kg ( <i>n</i> =10) | RM ANOVA                                                                                                                                        | session                       | $F_{10,270}=140$     | $p<0.001$         | $\eta^2=0.84$ |               |
|        |                                 |                                                                                           |                                                                                                                                                 | session × CNO                 | $F_{20,270}=0.65$    | $p=0.871$         | $\eta^2=0.05$ |               |
| 5g     |                                 |                                                                                           | RM ANOVA                                                                                                                                        | reinforcement                 | $F_{1,27}=32.4$      | $p<0.001$         | $\eta^2=0.55$ |               |
|        |                                 |                                                                                           |                                                                                                                                                 | reinforcement × CNO           | $F_{2,27}=4.92$      | $p=0.015$         | $\eta^2=0.27$ |               |
| 5h     |                                 |                                                                                           | *post-hoc:<br>paired t-test                                                                                                                     | reinf vs. non-reinf (veh)     | $t_9=4.92$           | $p<0.001$         | $d=1.56$      |               |
|        |                                 |                                                                                           |                                                                                                                                                 | reinf vs. non-reinf (CNO 0.1) | $t_9=3.09$           | $p=0.013$         | $d=0.98$      |               |
|        |                                 |                                                                                           |                                                                                                                                                 | reinf vs. non-reinf (CNO 1.0) | $t_9=1.40$           | $p=0.194$         | $d=0.44$      |               |
| 5j     |                                 |                                                                                           | RM ANOVA                                                                                                                                        | reinforcement                 | $F_{1,27}=15.8$      | $p<0.001$         | $\eta^2=0.37$ |               |
|        |                                 |                                                                                           |                                                                                                                                                 | reinforcement × CNO           | $F_{2,27}=2.39$      | $p=0.111$         | $\eta^2=0.15$ |               |
| 5k     |                                 |                                                                                           | *post-hoc:<br>paired t-test                                                                                                                     | reinf vs. non-reinf (veh)     | $t_9=3.19$           | $p=0.011$         | $d=1.01$      |               |
|        |                                 | reinf vs. non-reinf (CNO 0.1)                                                             |                                                                                                                                                 | $t_9=1.69$                    | $p=0.126$            | $d=0.53$          |               |               |
|        |                                 | reinf vs. non-reinf (CNO 1.0)                                                             |                                                                                                                                                 | $t_9=1.73$                    | $p=0.118$            | $d=0.55$          |               |               |
| 5l     |                                 | preference ratio                                                                          | cocaine ±<br>vehicle/vehicle ( <i>n</i> =9)<br>vehicle/CNO ( <i>n</i> =8)<br>ifenprodil/vehicle ( <i>n</i> =8)<br>ifenprodil/CNO ( <i>n</i> =8) | RM ANOVA                      | session              | $F_{10,290}=189$  | $p<0.001$     | $\eta^2=0.87$ |
|        |                                 |                                                                                           |                                                                                                                                                 |                               | session × ifenprodil | $F_{10,290}=1.10$ | $p=0.365$     | $\eta^2=0.04$ |
|        | session × CNO                   |                                                                                           |                                                                                                                                                 |                               | $F_{10,290}=0.80$    | $p=0.626$         | $\eta^2=0.03$ |               |
|        | session × ifen × CNO            |                                                                                           |                                                                                                                                                 |                               | $F_{10,290}=0.13$    | $p=0.999$         | $\eta^2<0.01$ |               |
| 5m     | RM ANOVA                        |                                                                                           | reinforcement                                                                                                                                   | $F_{1,29}=3.75$               | $p=0.063$            | $\eta^2=0.11$     |               |               |
|        |                                 |                                                                                           | reinforcement × ifenprodil                                                                                                                      | $F_{1,29}=5.39$               | $p=0.027$            | $\eta^2=0.16$     |               |               |
|        |                                 |                                                                                           | reinforcement × CNO                                                                                                                             | $F_{1,29}=5.87$               | $p=0.022$            | $\eta^2=0.17$     |               |               |
|        |                                 |                                                                                           | reinforcement × ifen × CNO                                                                                                                      | $F_{1,29}=4.38$               | $p=0.045$            | $\eta^2=0.13$     |               |               |
| 5n     | post-hoc:<br>paired t-test      |                                                                                           | reinf vs. non-reinf (veh/veh)                                                                                                                   | $t_8=0.03$                    | $p=0.974$            | $d=0.01$          |               |               |
|        |                                 |                                                                                           | reinf vs. non-reinf (veh/CNO)                                                                                                                   | $t_7=3.18$                    | $p=0.016$            | $d=1.12$          |               |               |
|        |                                 |                                                                                           | reinf vs. non-reinf (ifen/veh)                                                                                                                  | $t_7=0.37$                    | $p=0.726$            | $d=0.13$          |               |               |
|        |                                 |                                                                                           | reinf vs. non-reinf (ifen/CNO)                                                                                                                  | $t_7=0.20$                    | $p=0.845$            | $d=0.07$          |               |               |
| 5o     | ANOVA                           |                                                                                           | ifenprodil                                                                                                                                      | $F_{1,29}=8.08$               | $p=0.008$            | $\eta^2=0.22$     |               |               |
|        |                                 |                                                                                           | CNO                                                                                                                                             | $F_{1,29}=4.92$               | $p=0.035$            | $\eta^2=0.15$     |               |               |
|        |                                 | ifenprodil × CNO                                                                          | $F_{1,29}=4.79$                                                                                                                                 | $p=0.037$                     | $\eta^2=0.14$        |                   |               |               |
|        |                                 | veh/veh vs. ifen/veh                                                                      | $t_{15}=2.13$                                                                                                                                   | $p=0.050$                     | $d=1.03$             |                   |               |               |
|        |                                 | veh/veh vs. veh/CNO                                                                       | $t_{15}=0.06$                                                                                                                                   | $p=0.950$                     | $d=0.03$             |                   |               |               |
| 5p     | post-hoc:<br>unpaired<br>t-test | veh/CNO vs. ifen/CNO                                                                      | $t_{14}=0.39$                                                                                                                                   | $p=0.702$                     | $d=0.20$             |                   |               |               |
|        |                                 | ifen/veh vs. ifen/CNO                                                                     | $t_{14}=2.20$                                                                                                                                   | $p=0.045$                     | $d=1.10$             |                   |               |               |
|        |                                 | reinforcement                                                                             | $F_{1,29}=3.13$                                                                                                                                 | $p=0.088$                     | $\eta^2=0.10$        |                   |               |               |
|        |                                 | reinforcement × ifenprodil                                                                | $F_{1,29}=0.10$                                                                                                                                 | $p=0.761$                     | $\eta^2<0.01$        |                   |               |               |
| 5q     | RM ANOVA                        | reinforcement × CNO                                                                       | $F_{1,29}=0.33$                                                                                                                                 | $p=0.138$                     | $\eta^2=0.07$        |                   |               |               |
|        |                                 | reinforcement × ifen × CNO                                                                | $F_{1,29}=0.14$                                                                                                                                 | $p=0.716$                     | $\eta^2=0.01$        |                   |               |               |
|        |                                 | ifenprodil                                                                                | $F_{1,29}=0.10$                                                                                                                                 | $p=0.759$                     | $\eta^2<0.01$        |                   |               |               |
| 5r     | ANOVA                           | CNO                                                                                       | $F_{1,29}=4.37$                                                                                                                                 | $p=0.046$                     | $\eta^2=0.13$        |                   |               |               |
|        |                                 | ifenprodil × CNO                                                                          | $F_{1,29}=0.22$                                                                                                                                 | $p=0.641$                     | $\eta^2=0.01$        |                   |               |               |

\*planned comparison
